# Supplementary material for: Proteomic and Isotopic Response of Desulfovibrio vulgaris to DsrC Perturbation
Source: Front Microbiol. 2019 Apr 11;10:658. doi: 10.3389/fmicb.2019.00658 (PMC6470260; doi:10.3389/fmicb.2019.00658)
Supplement: Supplementary file 2 [file Table_1.XLSX]

## Sheet: Chemostat_Summary
	Strain	Avg Dilution rate (per day), for t1-5	Dilution Rate StdDev (per day) for t1-5	Max: %departure from steady state t1-5	Min: %departure from steady state t1-5	csSRR (fmol S per cell per day)	csSRR StdDev
	WT	1.06917	0.0762963	0.0614618	-0.0815731	6.24238	1.42439
	IPFG07	1.05547	0.0340213	0.0299506	-0.0318352	6.68597	0.991517
		Detailes on Chemostat_Summary sheet

## Sheet: Strain_Summary
	Table S1. Strains cultured in this study in grey.
	Strain ID	Strain description
	Wildtype (WT)	D. vulgaris subsp. vulgaris DSM 655T
	IPFG06	WT + plasmid DsrC
	IPFG07	∆dsrC + plasmid DsrC
	IPFG09	∆dsrC + plasmid DsrC with CysB mutation
	Mutants are from Santos et al. (2015).

## Sheet: Batch_rates
30C. Innoculated from MO medium with 0.1g/l yeast; 30:30 Lact:SO4
T_hrs	WT_OD600	T_hrs	07_OD600
0	0.055	0	0.052
4	0.087	4	0.071
9	0.29	9	0.101
22.5	0.824	22.5	0.193
32	0.918	32	0.294
		45.5	0.501
		48.5	0.529
T_d (per hr)	T_d (per day)	MAX per day	Min (D/2)_hrs
WT	WT	WT	WT
0.114644	2.75145
0.240795	5.77907	5.77907	4.15292
0.0773548	1.85651
0.0113712	0.27291
IPFG07	IPFG07	IPFG07	IPFG07
0.0479681	1.15123
0.0443042	1.0633
0.0394834	0.947602
0.0181274	0.435059	1.15123	20.8472

## Sheet: Isotope_Data_Summary
Isotope Data Summary
	Time Point	M1 𝛅34SBaSO4	M2 𝛅34SBaSO4	M1 𝛅34SAg2S	M2 𝛅34SAg2S	Avg 𝛅34SBaSO4	Avg 𝛅34SAg2S	34εBaSO4/Ag2S
	WT_in	-1.52	-1.35	-	-	-1.435	-	-
	WT_t1	7.73	8.01	-10.09	-10.15	7.87	-10.12	18.1327
	WT_t2	7.46	7.61	-9.47	-9.45	7.535	-9.46	17.124
	WT_t3	6.54	6.72	-10.06	-9.91	6.63	-9.985	16.7259
	WT_t4	7.21	7.34	-9.91	-9.99	7.275	-9.95	17.3512	StdDeV
	WT_t5	7.17	7.16	-9.75	-9.91	7.165	-9.83	17.1176	0.521864
	07_in	-1.24	-1.15	-	-	-1.195	-	-
	07_t1	5.08	4.84	-7.29	-7.47	4.96	-7.38	12.4015
	07_t2	5.53	5.54	-7.77	-7.78	5.535	-7.775	13.3841
	07_t3	4.98	5.02	-7.26	-7.38	5	-7.32	12.3819
	07_t4	5.28	5.26	-7.09	-7.04	5.27	-7.065	12.4003
	07_t5	4.98	5.15	-7.15	-7.18	5.065	-7.165	12.2923	0.456178
	Isotope value in ‰. All 𝛅34S vs. V-CDT; M1 and M2 refer to technical replicate measurements.

## Sheet: Chemostats_Calcs
Reactor	Date and Time	A600	pH	Temp 'C (digi)	Gas P (psig)	Reactor Volume	Liq. Trap L (from reactor)	cells/L (calc)	mM SO4 consumed	mmol's SO4 consumed	mmols SO4 consumed per day	mmols sulfide produced (G+R)	mmols H2S produced per day	H2S/vol (mmol / L)	csSRR from H2S (fmol/cell*day)	csSRR from SO4 (fmol/cell*day)	csSRR avg.	Time Elapsed (Days)	Sample Collection Interval (days)	turnovers to date	jo (l/hr)	D (per hour) = jo/V	dC/dt	rg (for all V)	mu (per hour)	Doubling time (days)	(mu) - (D)	% from SS	Sampling Time Point
DvH_WT	2016-03-15 12:34:00	0.594	7.34	30.5	2.5	0.3												0	0	0	-	-	-	-	0	-	-	-	-
DvH_WT	2016-03-16 10:20:00	0.59	7.19	30.6	2	0.3	0.22											0.906944	0.906944	0.733333	0.0101072	0.0336907	-0.000183767	0.0196937	0.0333792	1.24828	-0.00031147	-0.00924499	-
DvH_WT	2016-03-16 18:28:00	0.37	7.34	30.4	2	0.3	0.09											1.24583	0.338889	1.03333	0.0110656	0.0368852	-0.0270492	-0.0134016	-0.0362206	-1.15036	-0.0731059	-1.98198	-
DvH_WT	2016-03-17 08:13:00	0.279	7.1	30.4	2	0.32	0.16											1.81875	0.572917	1.53333	0.0116364	0.0363636	-0.00661818	0.00352727	0.0126426	3.29575	-0.0237211	-0.65233	-
DvH_WT	2016-03-17 21:38:00	0.109	7.28	30.4	2	0.33	0.163											2.37778	0.559028	2.02727	0.0121491	0.0368154	-0.0126708	-0.00865793	-0.0794306		-0.116246	-3.15754	-
DvH_WT	2016-03-18 11:30:00	0.413	7.14	30.5	2	0.33	0.17											2.95556	0.577778	2.54242	0.0122596	0.0371503	0.0219231	0.0372662	0.0902329	0.461768	0.0530825	1.42886	-
DvH_WT	2016-03-18 18:02:00	0.491	7.14	30.4	2	0.3	0.104											3.22778	0.272222	2.88909	0.0159184	0.0530612	0.0119388	0.0379918	0.0773764	0.538493	0.0243152	0.458248	-
DvH_WT	2016-03-19 08:28:00	0.586	7.3	30.6	2	0.3	0.188											3.82917	0.601389	3.51576	0.0130254	0.043418	0.00658199	0.0320249	0.0546501	0.762427	0.0112321	0.258696	-
DvH_WT	2016-03-19 18:29:00	0.61	7.31	30.6	2	0.3	0.116											4.24653	0.417361	3.90242	0.0115807	0.0386023	0.00239601	0.0259434	0.0425302	0.979696	0.00392788	0.101752	-
DvH_WT	2016-03-20 18:05:00	0.569	7.3	30.6	2	0.3	0.265	5.031e+11	15.85	4.20025	4.27144	1.97466	2.00813	7.45156	3.5856	7.62683	5.60621	5.22986	0.983333	4.78576	0.0112288	0.0374294	-0.00173729	0.01956	0.0343761	1.21208	-0.00305323	-0.0815731	T1
DvH_WT	2016-03-21 16:43:00	0.578	7.22	30.6	2	0.3	0.266	5.112e+11	16.2	4.3092	4.5694	3.3691	3.57254	12.6658	6.57067	8.40411	7.48739	6.17292	0.943056	5.67242	0.0117526	0.0391753	0.000397644	0.0230409	0.0398632	1.04524	0.000687965	0.0175612	T2
DvH_WT	2016-03-26 18:19:00	0.112	7.16	30.6	2.1		-												0		-	-	-	-	0		-	-	-
DvH_WT	2016-04-01 11:09:00	0.604	7.22	30.5	2.1	0.305	0.195											16.941	5.70139	0.639344	0.00142509	0.00467243	0.00121008	0.00403223	0.00667588	6.24137	0.00200345	0.428781	-
DvH_WT	2016-04-02 16:39:00	0.533	7.29	30.5	2.1	0.3	0.349											18.1701	1.22917	1.80268	0.0118305	0.039435	-0.00240678	0.0186121	0.0349195	1.19322	-0.00451553	-0.114506	-
DvH_WT	2016-04-03 15:58:00	0.563	7.15	30.5	2.1	0.3	0.275											19.1417	0.971528	2.71934	0.0117941	0.0393138	0.00128663	0.0234203	0.0415991	1.00162	0.00228532	0.0581301	-
DvH_WT	2016-04-04 18:39:00	0.6	7.07	30.5	2.1	0.3	0.301	531000000000	13.6	4.0936	3.68194	3.4964	3.14479	11.6159	5.34458	6.25747	5.80102	20.2535	1.11181	3.72268	0.0112804	0.0376015	0.00138663	0.0239475	0.0399126	1.04395	0.00231106	0.0614618	T3
DvH_WT	2016-04-05 19:06:00	0.649	7.28	30.5	2.1	0.3	0.28											21.2722	1.01875	4.65601	0.0114519	0.0381731	0.00200409	0.0267785	0.0412611	1.00983	0.00308797	0.0808937	-
DvH_WT	2016-04-06 13:22:00	0.672	7.22	30.6	2.1	0.3	0.222	595800000000	15.35	3.4077	4.47727	2.96277	3.89269	13.3458	6.35233	7.30628	6.82931	22.0333	0.761111	5.39601	0.0121533	0.0405109	0.00125912	0.0284825	0.0423846	0.98306	0.0018737	0.0462516	T4
DvH_WT	2016-04-07 17:29:00	0.693	7.21	30.6	2.1	0.3	0.322	614700000000	15.45	4.9749	4.24651	3.6524	3.11764	11.3429	4.6467	6.32923	5.48796	23.2049	1.17153	6.46934	0.0114523	0.0381743	0.000746888	0.0272017	0.039252	1.06152	0.00107776	0.0282326	T5
DvH_WT	2016-04-10 09:44:00	0.742	7.08	30.5	2	0.29	0.61											25.8819	2.67708	8.57279	0.00949416	0.0327385	0.000762646	0.0250546	0.0337663	1.23397	0.00102782	0.031395	-
DvH_WT	2016-04-12 13:45:00	0.658	7.16	30.5	2	0.31	0.316											28.0493	2.16736	9.59215	0.00607498	0.0195967	-0.00161487	0.0112798	0.0171425	2.43061	-0.00245421	-0.125236	-
DvH_WT	2016-04-13 11:01:00	0.636	7.05	30.6	2	0.3	0.257											28.9354	0.886111	10.4488	0.0120846	0.0402821	-0.00103448	0.024585	0.0386556	1.0779	-0.00162655	-0.0403788	-
IPFG_07	2016-03-15 12:34:00	0.529	7.36	30.5	2.5	0.3	-											0	0	0	-	-	-	-	-	-	-	-	-
IPFG_07	2016-03-16 10:20:00	0.325	7.13	30.6	2	0.3	0.22											0.906944	0.906944	0.733333	0.0101072	0.0336907	-0.00937213	0.00157734	0.00485334	8.58515	-0.0288373	-0.855944	-
IPFG_07	2016-03-16 18:29:00	0.306	7.27	30.4	2	0.3	0.083											1.24653	0.339583	1.01	0.010184	0.0339468	-0.00233129	0.00805644	0.0263282	1.58258	-0.00761859	-0.224427	-
IPFG_07	2016-03-17 08:14:00	0.36	7.3	30.4	2	0.305	0.162											1.81944	0.572917	1.54115	0.0117818	0.0386289	0.00392727	0.0178337	0.049538	0.841105	0.0109091	0.282407	-
IPFG_07	2016-03-17 21:39:00	0.465	7.18	30.4	2	0.31	0.16											2.37847	0.559028	2.05728	0.0119255	0.0384692	0.00782609	0.0257143	0.0552995	0.753472	0.0168303	0.4375	-
IPFG_07	2016-03-18 11:30:00	0.625	7.24	30.5	2	0.31	0.17											2.95556	0.577083	2.60566	0.0122744	0.0395947	0.0115523	0.0362991	0.0580785	0.71742	0.0184838	0.466824	-
IPFG_07	2016-03-18 18:03:00	0.622	7.24	30.4	2	0.3	0.086											3.22847	0.272917	2.89233	0.0131298	0.0437659	-0.000458015	0.0267644	0.0430295	0.968327	-0.000736359	-0.0168249	-
IPFG_07	2016-03-19 08:29:00	0.593	7.13	30.6	2	0.31	0.188											3.82986	0.601389	3.49878	0.0130254	0.0420174	-0.00200924	0.0229071	0.0386292	1.07863	-0.00338826	-0.0806394	-
IPFG_07	2016-03-19 18:31:00	0.591	7.24	30.6	2	0.31	0.116											4.24792	0.418056	3.87298	0.0115615	0.037295	-0.000199336	0.021842	0.0369578	1.12741	-0.000337285	-0.0090437	-
IPFG_07	2016-03-20 18:12:00	0.582	7.25	30.6	2	0.3	0.275	5.148e+11	15.3	4.2075	4.26376	2.97799	3.01781	10.829	5.44543	7.69368	6.56955	5.23472	0.986806	4.78964	0.0116115	0.0387051	-0.000380014	0.0221464	0.0380522	1.09499	-0.000652945	-0.0168697	T1
IPFG_07	2016-03-21 16:43:00	0.598	7.27	30.6	2	0.3	0.268	529200000000	14.95	4.0066	4.27054	3.18986	3.4	11.9025	6.11758	7.68394	6.90076	6.17292	0.938194	5.68298	0.0119023	0.0396743	0.000710585	0.0244358	0.0408626	1.01968	0.00118827	0.0299506	T2
IPFG_07	2016-03-22 18:14:00	0.613	7.3	30.6	2	0.3	0.302	542700000000	14.6	4.4092	4.14712	3.40556	3.20314	11.2767	5.58842	7.23536	6.41189	7.23611	1.06319	6.68964	0.0118354	0.0394513	0.000587851	0.0247715	0.0404103	1.03109	0.000958974	0.0243078	T3
IPFG_07	2016-03-23 16:28:00	0.616	7.16	30.6	2	0.305	0.254											8.1625	0.926389	7.52243	0.0114243	0.0374567	0.000134933	0.0232082	0.0376757	1.10593	0.000219046	0.00584799	-
IPFG_07	2016-03-24 17:55:00	0.624	7.31	30.6	2	0.305	0.289											9.22292	1.06042	8.46997	0.0113556	0.0372315	0.000314342	0.0235468	0.0377352	1.10418	0.000503753	0.0135303	-
IPFG_07	2016-03-25 20:31:00	0.602	7.31	30.6	2.1	0.3	0.325											10.3313	1.10833	9.5533	0.012218	0.0407268	-0.000827068	0.0236905	0.039353	1.05879	-0.00137387	-0.0337337	-
IPFG_07	2016-03-26 18:18:00	0.617	7.21	30.6	2.1	0.295	0.252	546300000000	15.25	3.843	4.23406	2.81239	3.09858	11.1603	5.33822	7.29443	6.31633	11.2389	0.907639	10.4075	0.0115685	0.0392152	0.0006886	0.0248844	0.0403312	1.03311	0.00111605	0.0284595	T4
IPFG_07	2016-03-27 17:01:00	0.6	7.04	30.5	2.1	0.3	0.267	531000000000	15.65	4.17855	4.41461	3.55214	3.75282	13.3039	6.64537	7.81726	7.23131	12.1854	0.946528	11.2975	0.0117535	0.0391783	-0.000748349	0.0227586	0.037931	1.09848	-0.00124725	-0.0318352	T5
OD to Cell Count Conversion for DvH:														WT_avg	5.29998	7.18478	6.24238
y = 9E+11x - 9E+09														WT_StdDev	1.23389	0.906755	1.42439
R² = 0.95954														07_avg	5.82701	7.54493	6.68597
														07_StdDev	0.546714	0.261817	0.991517

## Sheet: IC_Summary
Ion Chromatography results
	From Effluent Liquid Traps (L)						From Influent medium (M)
	SULFATE (mM)					LACTATE (mM) UV)	SULFATE (mM)	LACTATE (mM)
	t1	t2	t3	t4	t5	t5	t1-5	t1-5	t1-5	t5 %SO4 Left
WT a	13.7	13.5	16.3	14.5	14.1	< 0.07	29.7	30.136	30.3452	0.474747
WT b	13.8	13.3	15.7	14	14.2	< 0.07	29.5	30.05	30.2722	0.481356
WT Average	13.75	13.4	16	14.25	14.15	< 0.07	29.6	30.093	30.3087	0.478041
WT Consumed	15.85	16.2	13.6	15.35	15.45	-	-	-	-	-
IPFG07 a	13.5	15.2	14.7	14.9	13.5	< 0.07	29.4	30.0213	30.1198	0.459184
IPFG07 b	13.7	12.7	13.9	12.4	13	< 0.07	28.4	30.4513	30.6716	0.457746
07 Average	13.6	13.95	14.3	13.65	13.25	< 0.07	28.9	30.2363	30.3957	0.458478
07 Consumed	15.3	14.95	14.6	15.25	15.65	-	-	-	-	-
Detector	via RID	via RID	via RID	via RID	via RID	via UV	via RID	via UV	via RID

## Sheet: Cline_summary
Sample	Date and time	Abs 670nm
0mM MilliQ	2017-01-31 15:30:00	0			Concentration (mM)	Abs670nm
0.03125mM A	2017-02-01 14:01:00	0.23			0	0
0.0625mM A	2017-02-01 14:02:00	0.404			0.03125	0.23
0.125mM A	2017-02-01 14:03:00	0.882			0.0625	0.404
0.25mM A	2017-02-01 14:04:00	1.641			0.125	0.882
1mM A	2017-02-01 14:05:00	3.129			0.25	1.641
0.03125 mM B	2017-02-01 14:08:00	0.214		out of linear range	1	3.129
0.0625 mM B	2017-02-01 14:09:00	0.47			0.03125	0.214
0.125 mM B	2017-02-01 14:09:00	0.776			0.0625	0.47
0.25 mM B	2017-02-01 14:10:00	1.671			0.125	0.776
1 mM B	2017-02-01 14:11:00	3.162			0.25	1.671
				out of linear range	1	3.162
Gas samples diluted 10 uL sample: 990 uL deoxygenated MilliQ					Conc = 0.1519*(Abs670nm) - 0.0019
					Concentration (mM)	Dilution Corrected Concentration (mM)					Sample	Avg Concentration (mM)	Stdev	assumes 100mL trap vol.(mmol)	G+L
WT G t1 A	2017-02-01 17:19:00	1.403			0.211216	21.1216					WT Gas t1	19.7317	1.96559	1.97317	1.97466
WT G t2 A	2017-02-01 17:20:00	2.241			0.338508	33.8508					WT Gas t2	32.8103	1.47151	3.28103	3.3691
WT G t3 A	2017-02-01 17:22:00	2.333			0.352483	35.2483					WT Gas t3	34.6635	0.827053	3.46635	3.4964
WT G t4 A	2017-02-01 17:24:00	1.841			0.277748	27.7748					WT Gas t4	28.9596	1.67559	2.89596	2.96277
WT G t5 A	2017-02-01 17:26:00	2.256			0.340786	34.0786					WT Gas t5	34.7014	0.880758	3.47014	3.6524
WT G t1 B	2017-02-01 17:27:00	1.22			0.183418	18.3418
WT G t2 B	2017-02-01 17:31:00	2.104			0.317698	31.7698
WT G t3 B	2017-02-01 17:30:00	2.256			0.340786	34.0786
WT G t4 B	2017-02-01 17:34:00	1.997			0.301444	30.1444
WT G t5 B	2017-02-01 17:37:00	2.338			0.353242	35.3242
07 G t1 A	2017-02-01 17:42:00	2.005			0.302659	30.2659					07 Gas t1	29.7799	0.687421	2.97799	2.97799
07 G t2 A	2017-02-01 17:43:00	2.063			0.31147	31.147					07 Gas t2	31.5495	0.56927	3.15495	3.18986
07 G t3 A	2017-02-01 17:44:00	2.189			0.330609	33.0609					07 Gas t3	33.6002	0.762608	3.36002	3.40556
07 G t4 A	2017-02-01 17:46:00	1.796			0.270912	27.0912					07 Gas t4	27.79	0.988168	2.779	2.81239
07 G t5 A	2017-02-01 17:48:00	2.329			0.351875	35.1875					07 Gas t5	34.7622	0.601493	3.47622	3.55214
07 G t1 B	2017-02-01 17:50:00	1.941			0.292938	29.2938
07 G t2 B	2017-02-01 17:52:00	2.116			0.31952	31.952
07 G t3 B	2017-02-01 17:53:00	2.26			0.341394	34.1394
07 G t4 B	2017-02-01 17:55:00	1.888			0.284887	28.4887
07 G t5 B	2017-02-01 17:57:00	2.273			0.343369	34.3369
Reactor samples diluted 15 uL sample: 985 uL deoxygenated MilliQ
											Sample	Avg Concentration (mM)	Stdev	Assumes 300mL
WT R t1 A	2017-02-02 13:26:00	0.02			0.001138	0.0758667					WT Rea t1	0.00498	0.100249	0.001494
WT R t2 A	2017-02-02 13:27:00	0.043			0.0046317	0.30878					WT Rea t2	0.29359	0.0214819	0.088077
WT R t3 A	2017-02-02 13:28:00	0.041			0.0043279	0.288527					WT Rea t3	0.100171	0.266376	0.0300512
WT R t4 A	2017-02-02 13:29:00	0.052			0.0059988	0.39992					WT Rea t4	0.222703	0.250622	0.066811
WT R t5 A	2017-02-02 13:30:00	0.072			0.0090368	0.602453					WT Rea t5	0.607517	0.00716063	0.182255
WT R t1 B	2017-02-02 13:32:00	0.006			-0.0009886	-0.0659067
WT R t2 B	2017-02-02 13:33:00	0.04			0.004176	0.2784
WT R t3 B	2017-02-03 13:32:59	0.0038			-0.00132278	-0.0881853
WT R t4 B	2017-02-02 13:35:00	0.017			0.0006823	0.0454867
WT R t5 B	2017-02-02 13:36:00	0.073			0.0091887	0.61258
07 R t1 A	2017-02-02 13:37:00	0.004			-0.0012924	-0.08616					07 Rea t1	-0.0507167	0.0501244	0
07 R t2 A	2017-02-02 13:38:00	0.026			0.0020494	0.136627					07 Rea t2	0.116373	0.0286425	0.034912
07 R t3 A	2017-02-02 13:39:00	0.028			0.0023532	0.15688					07 Rea t3	0.151817	0.00716063	0.045545
07 R t4 A	2017-02-02 13:40:00	0.027			0.0022013	0.146753					07 Rea t4	0.11131	0.0501244	0.033393
07 R t5 A	2017-02-02 13:41:00	0.053			0.0061507	0.410047					07 Rea t5	0.253083	0.22198	0.075925
07 R t1 B	2017-02-02 13:42:00	0.011			-0.0002291	-0.0152733
07 R t2 B	2017-02-02 13:43:00	0.022			0.0014418	0.09612
07 R t3 B	2017-02-02 13:45:00	0.027			0.0022013	0.146753
07 R t4 B	2017-02-02 13:45:00	0.02			0.001138	0.0758667
07 R t5 B	2017-02-02 13:47:00	0.022			0.0014418	0.09612
